# Supplementary material
Source: PubMed Central journal article supplement (PMC2841049)
Supplement: NIHMS175670-supplement-01.pdf [file NIHMS175670-supplement-01.pdf]

## Inventory of the Supplemental Information

### 1. Supplemental Data

Figure S1: This figure is the supplemental materials to Figure 1 which demonstrates the interaction between BCL6 and Notch1. It includes additional data which reveal how BCL6 interacts with Notch1.

Figure S2: This figure is the supplemental materials to Figure 2 which demonstrates the roles of BCL6 and Notch1 during LR patterning in *Xenopus*. It includes the expression profile of *BCL6*, *Notch1* and other components of Notch signaling, the effects of Morpholino Oligos (MO), and quantitative RT-PCR analysis which supports the results from whole mount *in situ* hybridization. Additional data supporting the role of Notch1 on the induction of symmetric *Xnr1* expression in the GRP is also shown.

Figure S3: This figure is the supplemental materials to Figure 3 which demonstrates the role of BCL6 for Notch signaling during LR asymmetry. It includes a model diagram that explains the relationship between BCL6 and Notch1 on *Pitx2* expression and additional data which confirm the function of NBD-S.

Figure S4: This figure is the supplemental materials to Figure 5 which demonstrates that *ESR1* is a target of BCL6 during LR patterning and neural development. It includes the expression profile of *ESR1* in the stage25 LPM, additional data that confirm the role of BCL6 on *ESR1* expression, the effect of MO, and quantitative RT-PCR analysis which supports the results from whole mount *in situ* hybridization.

Figure S5: This figure is the supplemental materials to Figure 6 which demonstrates how BCL6 represses the transcription of *ESR1* gene. It includes results of luciferase assay that were obtained by a deletion analysis of genomic fragments of *ESR1* gene and EMSA with shorter fragments generated from the BCL6-response element.

### 2. Experimental Procedures

This includes the detail of plasmid construction, sequences of MOs, the information of probes for whole mount *in situ* hybridization and sequences of primers.

### 3. References

In this section, all references, which were used in the supplemental information, are included.

## Supplemental Information

## 1. Supplemental Data

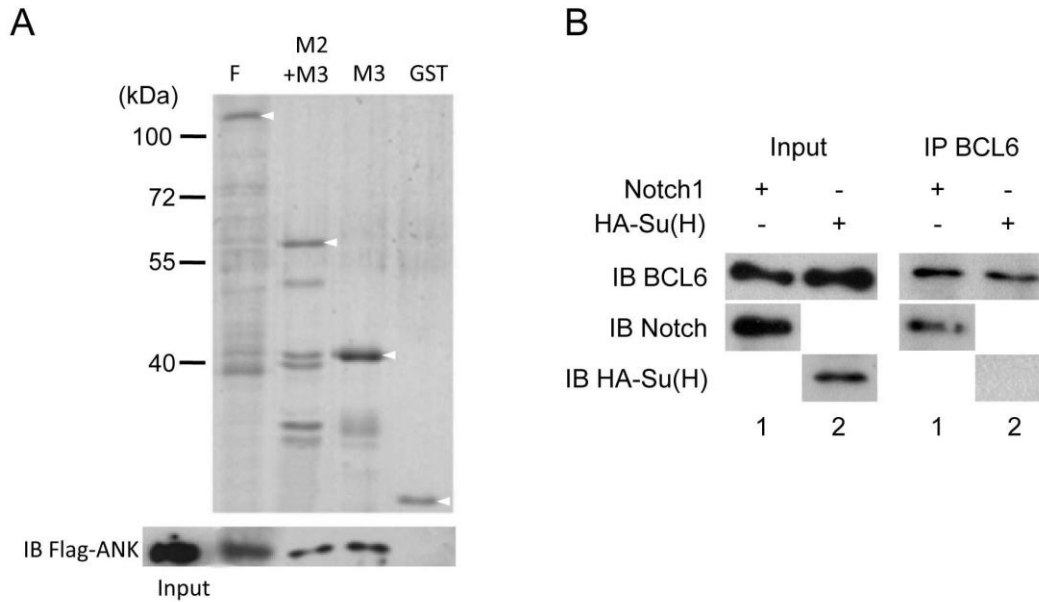

Figure S1. BCL6 directly interacts with the ANK domain of NICD.

A: The top panel shows the expression of GST constructs and the bottom panel shows the interactions between Flag-tagged ANK domain of Notch1 (Flag-ANK) and GST-BCL6 constructs. Each arrowhead indicates an intact GST fusion protein. B: Co-immunoprecipitation using *in vitro* synthesized proteins.

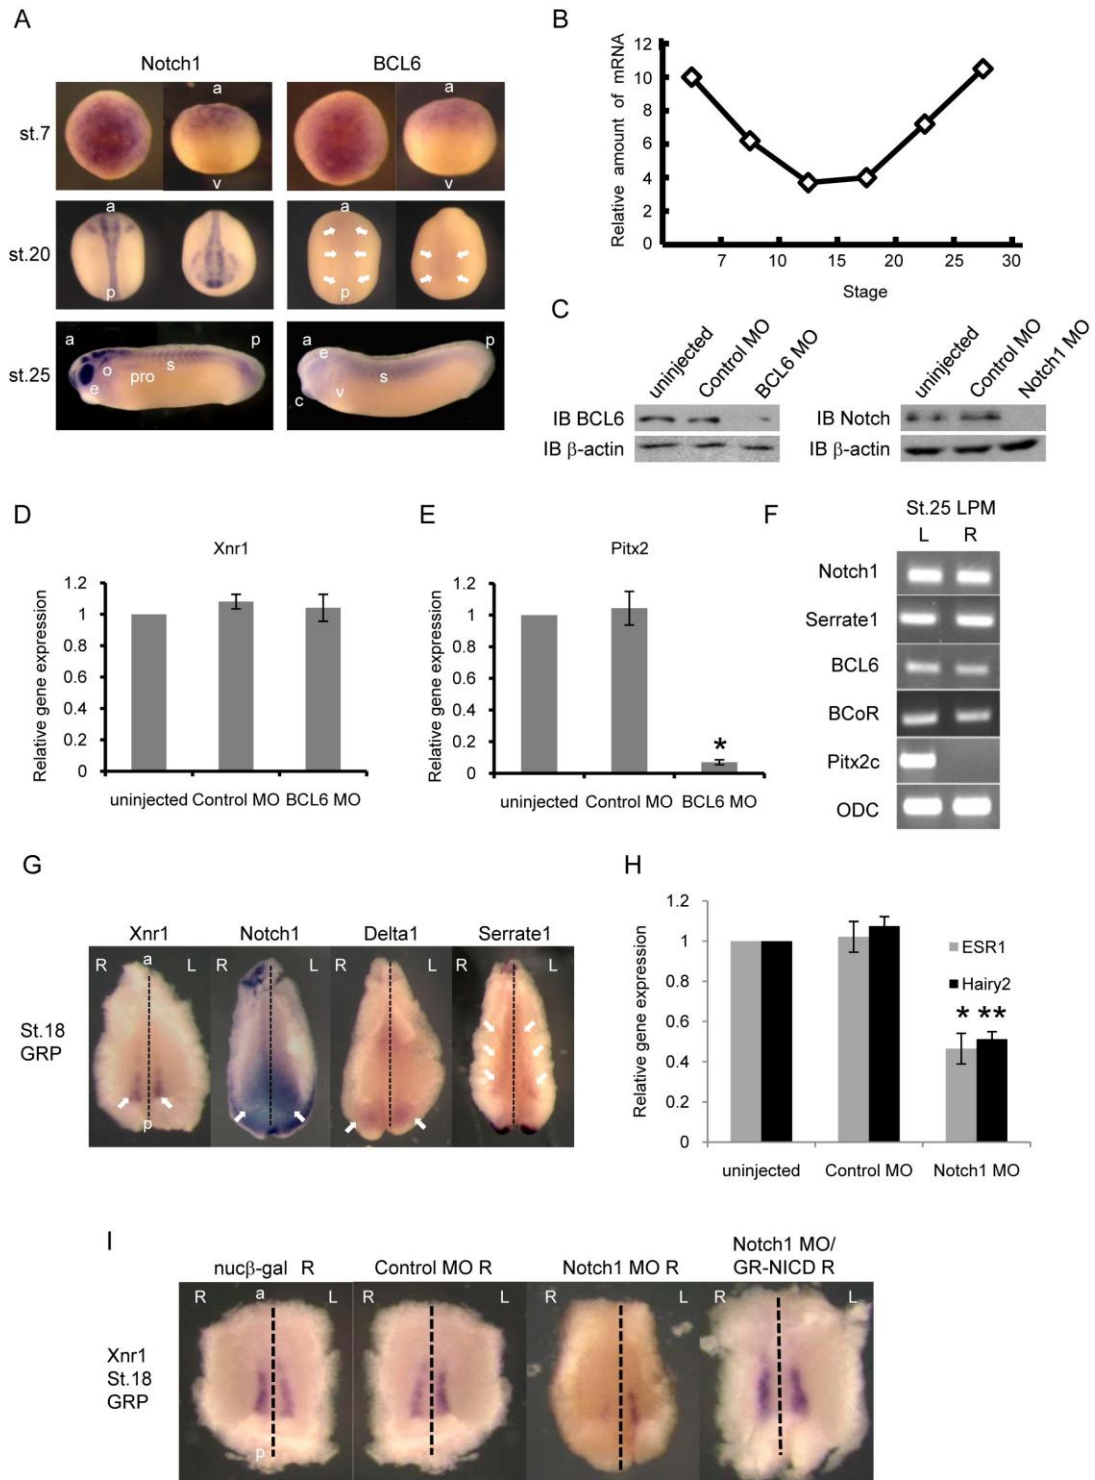

Figure S2. BCL6 and Notch signaling are important for LR patterning in *Xenopus*.

A: Whole mount *in situ* hybridization for *Notch1* and *BCL6*. Stage 7: The left panel presents the animal pole view and the right panel presents the lateral view. a: animal side, v: vegetal side. Stage 20: *BCL6* expression is indicated by white arrows. The left panel presents the dorsal view and the right panel presents the anterior view. a: anterior, p: posterior. Stage 25: The lateral views are shown. c: cement gland, e: eye, o: otic vesicle, pro: pronephros, s: somites, v: visceral pouches, a: anterior, p: posterior. B: Total RNA was isolated from 10 embryos at each developmental stage and used for quantitative RT-PCR. *Ornithine decarboxylase (ODC)* was used for the normalization of samples. C: Following the injection of MO at 2-cell stage, the level of *BCL6* protein or *Notch1* protein examined at stage 22 or stage 17, respectively. The level of  $\beta$ -actin protein was used for the normalization of samples. D, E: *BCL6* MO was injected into the left side of embryos and left LPM tissues were dissected at stage 22 for *Xnr1* expression (D) and stage 25 for *Pitx2* expression (E) for quantitative RT-PCR. \*  $P < 0.05$ ,  $n = 3$ . F: LPM tissues were dissected from 20 embryos and gene expression was tested by RT-PCR. *ODC* was used for the normalization of samples. L: left, R: right. G: Arrows indicate symmetric *Xnr1*, *Notch1*, *Delta1* and *Serrate1* expression. The dotted line indicates the embryonic midline. H: *Notch1* MO was injected into two blastomeres of two-cell stage embryos and total RNA was isolated from stage 18 embryos. The expression of *ESR1* or *Hairy2* was examined by quantitative RT-PCR. \*  $P < 0.001$ ,  $n = 3$ . \*\*  $P < 0.001$ ,  $n = 3$ . I: *Notch1* MO or/and *GR-NICD* RNA was injected into the right side of embryos. *GR-NICD* was activated at stage 12 by DEX. The injected side is indicated by R (right) beside the names of injected samples. L: left, R: right, a: anterior, p: posterior.

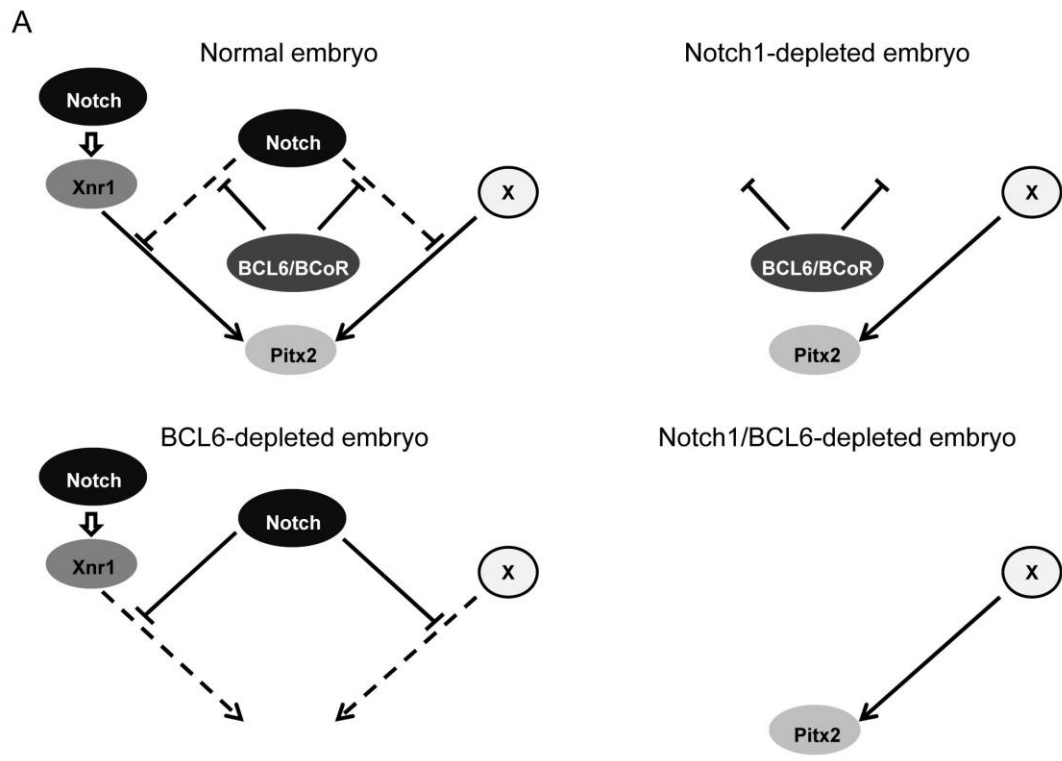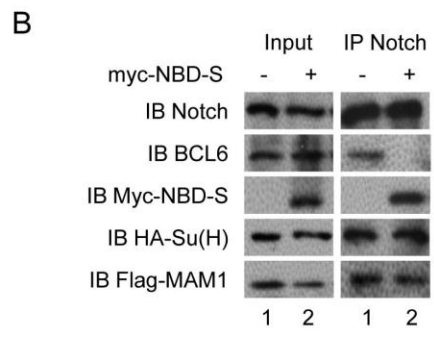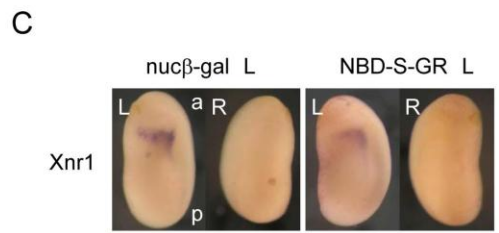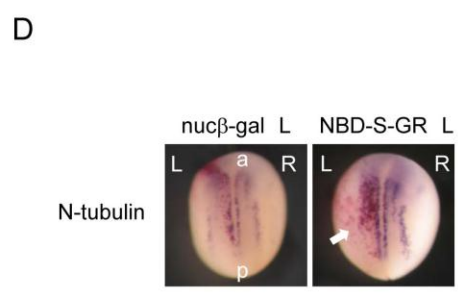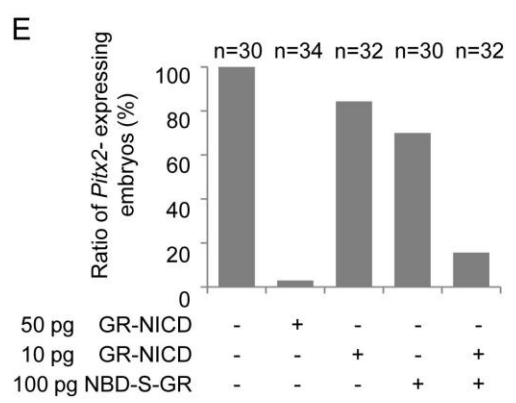

Figure S3. Notch signaling is an *in vivo* target of BCL6 for *Pitx2* expression.

A: A model for the regulation of *Pitx2* expression. “X” indicates an Xnr1-independent signal(s) that induces *Pitx2* expression. The dotted line indicates the suppressed signal.

B: HA-tagged Su(H), Flag-tagged MAM1 or/and Myc-tagged NBD-S was expressed in embryos and protein extracts were isolated from 50 embryos at stage 10.

Co-immunoprecipitation with  $\alpha$ -Notch antibody was performed. C, D: *NBD-S-GR* was injected into embryos and activated at stage 12 (C) and stage 4 (D). The injected side is indicated by L (left) beside the names of injected samples. L: left, R: right, a: anterior, p: posterior.

E: The expression of *Pitx2* at stage 25 was tested by whole mount *in situ* hybridization and the ratios of *Pitx2*-expressing embryo number versus total tested embryo number are shown. Total numbers of each injection are shown as “n” on the top of each bar.

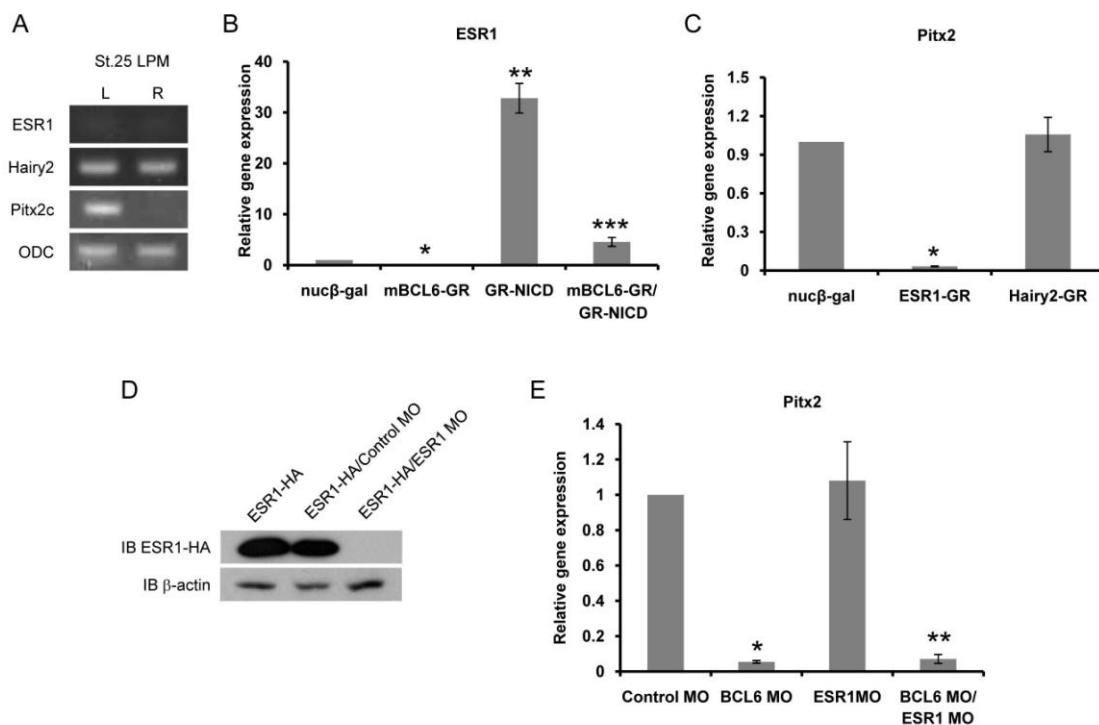

Figure S4. The expression of *ESR1* is suppressed by BCL6 in the LPM.

A: Gene expression was tested using the cDNA used in Figure S2 F. *ODC* was used for the normalization of samples. L: left, R: right. B: *mBCL6-GR* or/and *GR-NICD* was injected into the left side of embryos and left LPM tissues were dissected at stage 25 for quantitative RT-PCR. \*  $P < 0.001$ ,  $n=3$ , \*\* $P < 0.005$ ,  $n=3$ , \*\*\* $P < 0.05$ ,  $n=3$ . C: *ESR1-GR* or *Hairy2-GR* was injected into the left side of embryos and left LPM tissues were dissected at stage 25 for quantitative RT-PCR. \*  $P < 0.001$ ,  $n=3$ . D: Following the injection of *ESR1 MO* or/and *ESR1-HA*, the level of *ESR1* protein tested at stage 22. The level of  $\beta$ -actin protein was used for the normalization of samples. E: *ESR1 MO* or/and *BCL6 MO* was injected into the left side of embryos and left LPM tissues were dissected at stage 25 for quantitative RT-PCR. \*  $P < 0.001$ ,  $n=3$ , \*\* $P < 0.001$ ,  $n=3$ .

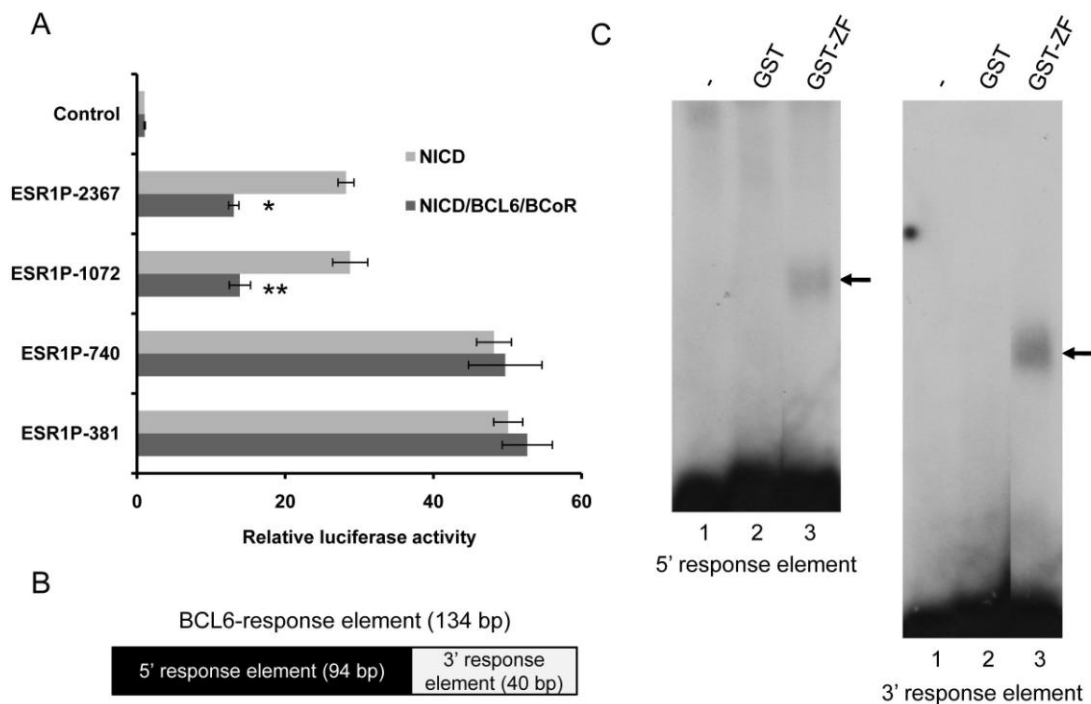

Figure S5. Multiple BCL6-binding sites are present in the genomic locus of *ESR1* gene. A: Relative luciferase activities were shown. 10 pg deleted *ESR1* genomic fragment construct linked to the luciferase reporter was injected with 50 pg *NICD*, 2 ng *BCL6* or/and 2 ng *BCoR* RNA and luciferase activities were measured in stage 10 embryos. 10 pg



pRL-CMV was co-injected and Renilla luciferase activity was used for the normalization of samples. \* P<0.005, n=3, \*\*P<0.005, n=3. B: Two non-overlapping fragments (5' response element and 3' response element) were designed in the BCL6-response element. C: Incubation of GST-ZF with 5' response element or 3' response element yielded one distinct retarded band indicated by an arrow.

## 2. Experimental Procedures

### DNA Plasmid

cDNA fragment of ANK domain of *Xenopus* Notch1 (aa: 1869-2112) (Wettstein et al., 1997) was sub-cloned into pGEX2T vector (GE Healthcare). *X. laevis BCL6* (IMAGE ID: 5513995), *X. laevis MAMI* (IMAGE ID: 3200582), mouse *BCoR* (IMAGE ID: 6412868), *X. laevis ESRI* (IMAGE ID: 5537441) and *X. laevis Hairy2* (IMAGE ID: 3580827) were purchased from Open Biosystems. Truncated *BCL6* fragments as described in Figure 1 C were sub-cloned into pGEX2T vector and full length (aa: 1751-2524) and the ANK domain of *NICD* fragments was sub-cloned into pCS2+3Flag vector generated by in-house. The fragment of *mBCL6* was sub-cloned into pCS2+6myc vector and pCS2+6myc-GR vector, which contains the glucocorticoid receptor binding domain (GR). The M3 domain (NBD-S) of *BCL6* was sub-cloned into pCS2+6myc-nls (Turner and Weintraub, 1994) and pCS2+6myc-nls-GR vectors. Full length of *X. laevis MAMI* or a dominant negative form of *MAMI* (Kiyota and Kinoshita, 2002) was sub-cloned into pCS2+3Flag and pCS2+3Flag-GR vectors. *X. laevis Su(H)* was sub-cloned into pCS2+HA vector. Full length of *BCoR* was sub-cloned into pCS2+6myc and pCS2+6myc-GR vectors. *X. laevis ESRI* or *Hairy2* was sub-cloned into pCS2+6myc-GR vector and *X. laevis ESRI* was also sub-cloned into pCS2+2HA vector gifted from Dr. K. Tamai. The zinc finger domain (ZF) of *BCL6* was sub-cloned into pCS2+6myc-nls-GR vector. pCS2+GR-NICD (GR-NICD in text), pCS2+GR-Su(H)VP16 (GR-at-Su(H) in text) and pCS2+GR-Su(H)DBM (GR-dn-Su(H) in text) were described previously (Chitnis et al., 1995; Ronés et al., 2000; Wettstein et al., 1997).

### **Morpholino Antisense Oligo**

Morpholino Antisense Oligos (MO) were designed according to sequence of *X. laevis BCL6* (accession number: NM\_001093558), *X. laevis Notch1* (accession number: M33874) and *X. laevis ESR1* (accession number: AF383157 and AB211546). Only a cDNA sequence for *BCL6* or *Notch1* was found by the database search. Sequences of BCL6 MO, Notch1 MO and ESR1 MO were followed, BCL MO: 5'-TTGAGTTTGAGATGCCATAGTGCCC -3', Notch1 MO: 5'-GCACAGCCAGCCCTATCCGATCCAT-3' and ESR1 MO: 5'-GCTGGTAGGAGCCATTATCCTAAGT-3'. The control Morpholino Oligo (Control MO) has the following sequences: 5'-CCTCTTACCTCAGTTACAATTTATA-3'.

### **Probes for Whole mount *in situ* hybridization**

Probes for *Xnr1*, *Notch1*, *Delta1*, *Serrate1* and *N-tubulin* were described previously (Fukumoto et al., 2005; Kiyota et al., 2008; Kiyota and Kinoshita, 2002; Ohi and Wright, 2007). *Pitx2* clone (clone ID: XL085o07) for probe was gifted from the National Institute of Basic Biology (NIBB). *ESR1* and *Hairy2* clones for probes were purchased from Open Biosystems.

### **Primers for RT-PCR analysis**

The primers for RT-PCR used in this work are followed. *Notch1*: 5'-gtacaagcccgtggcatatt-3'/5'-gatttgcttcggcatggtt-3', *Delta1*: 5'-attcttttggctgggctgtg-3'/5'-tctggcttccggtcagttct-3', *Serrate1*: 5'-tccgactcaaaccgttcttt-3'/5'-tctccgtacatgcactgctc-3' *BCL6*: 5'-ttctgtactctggggcaagg-3'/5'-tgggatacacacgacaaagc-3', *BCoR*: 5'-tgcagtgctcaagatggaac-3'/5'-agttccattgcttcgctgt-3', *Pitx2c*: 5'-tggctgggagtagagttgct-3'/5'-atcggtactgctgtcctcgt-3', *Xnr1*: 5'-tgtcgaaaatgggaaacctc-3'/5'-cgttcgggttggtacaactt-3', *ESR1*: 5'-atggttttgcacacaggtt-3'/5'-tggagcactgcgatcaatag-3', *Hairy2*: 5'-ttccgttctatgggaccctg-3'/5'-ctcctgcatgttcggaaagt-3' *ODC*: 5' acatggcattctccctgaag 3'/5' tggccaaggttaaagt 3'. Note, primers for *Pitx2c* can amplify left-specific expressing

*Pitx2* (Schweickert et al., 2000) but not other isoforms of *Pitx2*.

### Primers for ChIP

The primers for ChIP were designed according to sequences of *X. laevis ESR1* promoter (accession number: DQ096795) and *X. laevis Hairy2* promoter (accession number: AY037926). ESR1/CSL-binding site (40 cycles):

5'-agagcagcatattgcaggggaag-3'/5'-ggagagcatatgagctgtgg-3', Hairy2/CSL-binding site (36 cycles): 5'-tggtgcaaagcgctaataatg-3'/5'-tcgtgtgaaacctcactgc-3'.

### 3. References

Chitnis, A., Henrique, D., Lewis, J., Ish-Horowicz, D., and Kintner, C. (1995). Primary neurogenesis in *Xenopus* embryos regulated by a homologue of the *Drosophila* neurogenic gene Delta. *Nature* 375, 761-766.

Fukumoto, T., Kema, I.P., and Levin, M. (2005). Serotonin signaling is a very early step in patterning of the left-right axis in chick and frog embryos. *Curr Biol* 15, 794-803.

Kiyota, T., Kato, A., Altmann, C.R., and Kato, Y. (2008). The POU homeobox protein Oct-1 regulates radial glia formation downstream of Notch signaling. *Developmental biology* 315, 579-592.

Kiyota, T., and Kinoshita, T. (2002). Cysteine-rich region of X-Serrate-1 is required for activation of Notch signaling in *Xenopus* primary neurogenesis. *The International journal of developmental biology* 46, 1057-1060.

Ohi, Y., and Wright, C.V. (2007). Anteriorward shifting of asymmetric Xnr1 expression and contralateral communication in left-right specification in *Xenopus*. *Developmental biology* 301, 447-463.

Rones, M.S., McLaughlin, K.A., Raffin, M., and Mercola, M. (2000). Serrate and Notch specify cell fates in the heart field by suppressing cardiomyogenesis. *Development (Cambridge, England)* 127, 3865-3876.

Schweickert, A., Campione, M., Steinbeisser, H., and Blum, M. (2000). *Pitx2* isoforms: involvement of *Pitx2c* but not *Pitx2a* or *Pitx2b* in vertebrate left-right asymmetry.

Mechanisms of development *90*, 41-51.

Turner, D.L., and Weintraub, H. (1994). Expression of achaete-scute homolog 3 in *Xenopus* embryos converts ectodermal cells to a neural fate. *Genes & development* *8*, 1434-1447.

Wettstein, D.A., Turner, D.L., and Kintner, C. (1997). The *Xenopus* homolog of *Drosophila* Suppressor of Hairless mediates Notch signaling during primary neurogenesis.

*Development* (Cambridge, England) *124*, 693-702.
